# Supplementary material
Source: Elsevier journal article supplement (https://www.sciencedirect.com/science/article/pii/S223878541730724X)
Supplement: mmc1 [file S223878541730724X:mmc1.docx]

**Supplementary Materials**

**Figure S1: TGA profiles of a) VO2.0.5 H2O / ZrV2O7 , b) Ga doped VO2.0.5 H2O / ZrV2O7, ), c) Cr doped VO2.0.5 H2O / ZrV2O7  and , d) Cs doped VO2.0.5 H2O / ZrV2O7**

**Figure S2: DSC profiles of a) VO2.0.5 H2O / ZrV2O7 , b) Ga doped VO2.0.5 H2O / ZrV2O7, ), c) Cr doped VO2.0.5 H2O / ZrV2O7  and , d) Cs doped VO2.0.5 H2O / ZrV2O7.**
